# Supplementary material
Source: Research Square preprint supplement (doi:10.21203/rs.3.rs-9131602/v1)
Supplement: Supplementary file 1 [file af00e6a1d24a48d629bef46c.doc]

**Table S1:** CC stock Solutions used for Media preparation

| CC Macronutrients (10X) | Stocks (g/litre) | Volume used per litre of medium |
| --- | --- | --- |
| KNO3­ | 12.12 | 100 ml |
| NH4NO­3 | 6.4 |
| CaCl2­.2H2O | 5.88 |
| MgSO4­. 7H2O | 2.47 |
| KH2PO4 | 1.36 |
| CaCl2.2H2O (10X) | 5.88 | 10 ml |
| Fe-EDTA (10X) | 4.0 | 10 ml |
| CC micronutrients (10X) | mg per litre | Volume used for per litre of medium |
| H3BO3 | 310 | 10 ml |
| MnSO4.4H2O | 1115 |
| ZnSO4.7H2O | 576 |
| KI | 83 |
| Na2MoO4. 2H2O | 24 |
| CuSO4.5 H2O | 2.5 |
| CoSO4.7 H2O | 2.8 |
| CC Vitamins (10X) | mg per litre | Volume used per litre of medium |
| Nicotinic acid | 600 | 10 ml |
| Thiamin HCl | 850 |
| Pyridoxine HCl | 100 |
| Glycine | 200 |

**Table S2:** CC Media used in Particle Bombardment experiments for callus proliferation, osmoticum and regeneration.

| Components | Per litre | | |
| --- | --- | --- | --- |
| CC proliferation medium | CC osmoticum medium | CC regeneration medium |
| CC macronutrients | 100 ml | 100 ml | 100 ml |
| CaCl2.2H2O | 10 ml | 10 ml | 10 ml |
| Fe-EDTA | 10 ml | 10 ml | 10 ml |
| CC micronutrients | 10 ml | 10 ml | 10 ml |
| Sucrose | 20 g | 20 g | 20 g |
| Mannitol | 15 g | 36.4 g | 18.2 g |
| Sorbitol | 15 g | 36.4 g | 18.2 g |
| 2,4-D | 2.0 mg | 2.0 mg | --- |
| Casein hydrolysate | 1.0 g | 1.0 g | 1.0 g |
| Coconut water | 100 ml | 100 ml | 100 ml |
| CC vitamins (filter sterilized) | 10 ml | 10 ml | 10 ml |
| pH | 5.8 | 5.8 | 5.8 |
| Agarose | 6.0 g | 6.0 g | 6.0 g |

**Table S3:** MS media components used for rooting media preparation *(Murashige and Skoog, 1962).*

| Chemical | Final conc. per litre of MS medium | 10X Stock/250 ml | Quantity to be dispensed for 1 litre of MS medium |
| --- | --- | --- | --- |
| NH4NO3 | 1.65 g | 16.5 g | 25 ml |
| KNO3 | 1.90 g | 19.0 g |
| MgSO4.7H2O | 0.37 g | 3.70 g |
| KH2PO4 | 0.170 g | 1.70 g |

| CaCl2 | 0.440 g | 4.4 g | 25 ml |
| --- | --- | --- | --- |

| MnSO4 | 22.3 mg | 223 mg | 25 ml |
| --- | --- | --- | --- |
| ZnSO4 | 8.60 mg | 86 mg |
| H3BO3 | 6.2 mg | 62 mg |
| KI | 0.83 mg | 8.3 mg |
| Na2MoO4 | 0.25 mg | 2.5 mg |
| CuSO4 | 0.025 mg | 0.25 mg |
| CoCl2.6H2O | 0.025 mg | 0.25 mg |

| FeEDTA | 40 mg | 1.0 g | 10 ml |
| --- | --- | --- | --- |

| Nicotinic acid | 0.5 mg | 12.5 mg | 10 ml |
| --- | --- | --- | --- |
| Pyridoxine | 0.5 mg | 12.5mg |
| Thiamin HCl | 0.1 mg | 2.5 mg |
| Glycine | 2.0 mg | 50 mg |
| Myo-inositol | 100 mg | 2.5 g |

| Maltose monohydrate | 30.0 g | Added as solid |
| --- | --- | --- |
| pH | 5.8 | Adjust with 0.1 KOH and 0.1 HCl |

Table S4: Hoagland’s solution used for plant nutrition.

| Chemical | Final conc. per litre of MS medium | 10X Stock/250 ml | Quantity to be dispensed for 1 litre of MS medium |
| --- | --- | --- | --- |
| NH4NO3 | 1.65 g | 16.5 g | 25 ml |
| KNO3 | 1.90 g | 19.0 g |
| MgSO4.7H2O | 0.37 g | 3.70 g |
| KH2PO4 | 0.170 g | 1.70 g |

Supplementary info: X-Gluc staining solution preparation and use

A stock containing 2mM X-Gluc was prepared by dissolving 5.2 mg of X-Gluc in 50 µl of Dimethyl Sulfoxide (DMSO) and made upto 5 ml using histochemical reagent (50mM sodium phosphate buffer pH 7.0, 1mM EDTA pH 7.0, 0.1mM potassium ferricyanide and 0.1mM potassium ferrocyanide). X-Gluc staining solution was prepared by mixing 2.5 ml of X-Gluc stock solution (2mM), 1 ml of methanol and 1.5 ml of sodium phosphate buffer (50mM).
