# Supplementary material
Source: Research Square preprint supplement (doi:10.21203/rs.3.rs-9131602/v1)
Supplement: Supplementary file 2 [file d226999fbf5060af765617ff.docx]

**Table 1:** Summary of biolistic mediated transformation of ASD16 rice cultivar with *cry2Ac.*

| Expt. no | No. of explants bombarded | No. of lines Survived after 2nd or 3rd selection | No. of lines regenerated | Regeneration efficiency (%) | No. of positive lines | | Transformation efficiency (%) |
| --- | --- | --- | --- | --- | --- | --- | --- |
| *gusA* | *cry2Ac* |
| 1 | 100 | 19 | 9 | 9.00 | 9 | Not tested | -- |
| 2 | 85 | 16 | 6 | 7.05 | 6 | Not tested | -- |
| 3 | 105 | 14 | 8 | 7.06 | 8 | Not tested | -- |
| 4 | 60 | 3 | 3 | 5.00 | 3 | 3 | 5.00 |
| 5 | 100 | 21 | 15 | 15.00 | 15 | 15 | 15.00 |
| 6 | 70 | 10 | 7 | 10.00 | 7 | 7 | 10.00 |
| 7 | 90 | 45 | 38 | 42.22 | 38 | 34 | 37.77 |
| 8 | 75 | 19 | 13 | 17.33 | 13 | 17.33 | 17.33 |

No. of lines regenerated

Regeneration frequency = x 100

No of embryos bombarded

No. of transgenic events regenerated

Transformation frequency= x 100

No. of embryos bombarded

**Table 2:** Evaluation of stable Gus expression in calli lines after three rounds of selection.

| Experiment number | Number of lines assayed | Number of lines positive |
| --- | --- | --- |
| 1 | 3 | 3 |
| 2 | 7 | 7 |
| 3 | 6 | 6 |
| 4 | 3 | 3 |
| 5 | 9 | 9 |
| 6 | 8 | 8 |
| 7 | 12 | 12 |
| 8 | 6 | 6 |
